# Supplementary material for: Liquid crystalline and charge transport properties of double-decker cerium phthalocyanine complexes
Source: Royal Society of Chemistry journal article supplement (doi:10.1039/b616848p), 2007-01-01
Supplement: b616848p.pdf [file b616848p.pdf]

## Supporting information

### Liquid crystalline and charge transport properties of double-decker cerium phthalocyanine complexes

Fabien NEKELSON,<sup>a,b</sup> Hirosato Monobe<sup>a</sup> Motoo Shiro<sup>c</sup> and Yo Shimizu<sup>\*a</sup>

<sup>a</sup> Nanotechnology Research Institute, National Institute of Advanced Industrial Science and Technology (NRI, AIST Kansai centre), 1-8-31 Midorigaoka, Ikeda, Osaka 563-8577, Japan. Fax: +81-72-751-9628; Tel: +81-72-751-9525; E-mail: yo-shimizu@aist.go.jp

<sup>b</sup> JSPS Fellow

<sup>c</sup> Rigaku Corporation, Akishima-shi, Tokyo, 196-8666, Japan

#### Additional Figures and Tables:

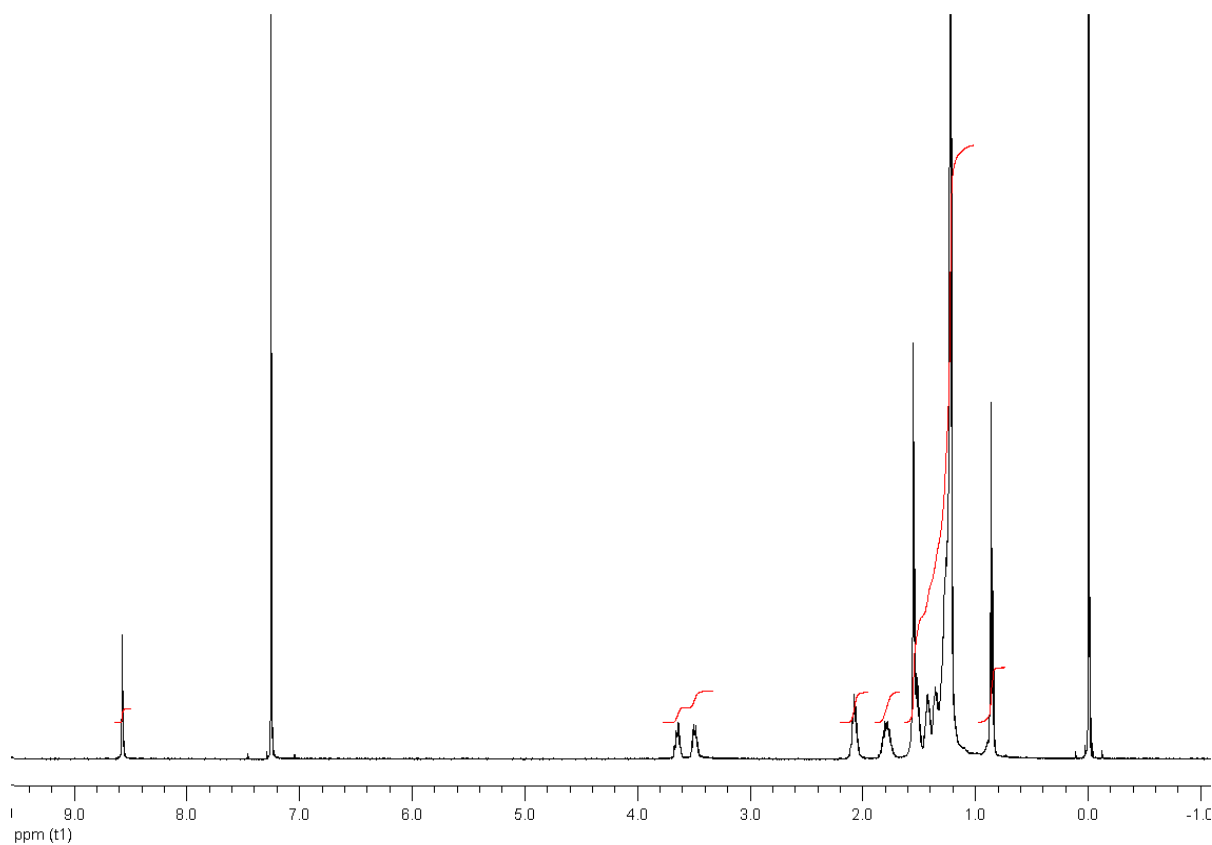

Fig. S1: <sup>1</sup>H NMR spectrum of **3f** in CDCl<sub>3</sub> at 500 MHz.

Table S1. Elemental analyses data for all homologues.

| Molecule                                                                         | Molecular formula                                                   | Molecular weight (g.mol <sup>-1</sup> ) | Elemental analysis; Found % (calculated %) |               |             |
|----------------------------------------------------------------------------------|---------------------------------------------------------------------|-----------------------------------------|--------------------------------------------|---------------|-------------|
|                                                                                  |                                                                     |                                         | C                                          | H             | N           |
| <b>(1a)</b> [(C <sub>8</sub> H <sub>17</sub> ) <sub>8</sub> Pc] <sub>2</sub> Ce  | C <sub>192</sub> H <sub>288</sub> CeN <sub>16</sub> S <sub>16</sub> | 3473.69                                 | 66.28 (66.39)                              | 8.24 (8.36)   | 6.21 (6.45) |
| <b>(1b)</b> [(C <sub>10</sub> H <sub>21</sub> ) <sub>8</sub> Pc] <sub>2</sub> Ce | C <sub>224</sub> H <sub>352</sub> CeN <sub>16</sub> S <sub>16</sub> | 3922.55                                 | 68.72 (68.59)                              | 9.05 (9.05)   | 5.67 (5.71) |
| <b>(1c)</b> [(C <sub>12</sub> H <sub>25</sub> ) <sub>8</sub> Pc] <sub>2</sub> Ce | C <sub>256</sub> H <sub>416</sub> CeN <sub>16</sub> S <sub>16</sub> | 4371.42                                 | 70.19 (70.34)                              | 9.60 (9.59)   | 5.10 (5.13) |
| <b>(1d)</b> [(C <sub>14</sub> H <sub>29</sub> ) <sub>8</sub> Pc] <sub>2</sub> Ce | C <sub>288</sub> H <sub>480</sub> CeN <sub>16</sub> S <sub>16</sub> | 4820.29                                 | 71.48 (71.76)                              | 9.98 (10.04)  | 4.64 (4.65) |
| <b>(1e)</b> [(C <sub>16</sub> H <sub>33</sub> ) <sub>8</sub> Pc] <sub>2</sub> Ce | C <sub>320</sub> H <sub>544</sub> CeN <sub>16</sub> S <sub>16</sub> | 5269.15                                 | 72.64 (72.94)                              | 10.44 (10.41) | 4.17 (4.25) |
| <b>(1f)</b> [(C <sub>18</sub> H <sub>37</sub> ) <sub>8</sub> Pc] <sub>2</sub> Ce | C <sub>352</sub> H <sub>608</sub> CeN <sub>16</sub> S <sub>16</sub> | 5718.02                                 | 73.64 (73.94)                              | 10.59 (10.72) | 3.62 (3.92) |

**Table S2.** XRD data of cerium phthalocyanine compounds **3a-3f**.

| Compound                                                                   | Temperatures/ °C | Lattice constant/ Å             | Spacing / Å                     |                    | Miller indices ( <i>h,k,l</i> ) |
|----------------------------------------------------------------------------|------------------|---------------------------------|---------------------------------|--------------------|---------------------------------|
|                                                                            |                  |                                 | Observed                        | Calculated for Hex | Hex                             |
| [(C <sub>8</sub> H <sub>17</sub> S) <sub>8</sub> Pc] <sub>2</sub> Ce (3a)  | 100              | a = 29.6                        | 25.7                            | 25.7               | (100)                           |
|                                                                            |                  |                                 | 14.4                            | 14.8               | (110)                           |
|                                                                            |                  |                                 | 12.4                            | 12.8               | (200)                           |
|                                                                            |                  |                                 | 9.3                             | 9.7                | (210)                           |
|                                                                            |                  |                                 | 8.2                             | 8.8                | (300)                           |
|                                                                            |                  |                                 | 6.8                             | 7.1                | (310)                           |
|                                                                            |                  |                                 | 6.1                             | 6.4                | (400)                           |
| 4.2                                                                        |                  | Halo of molten alkylthio chains |                                 |                    |                                 |
| [(C <sub>10</sub> H <sub>21</sub> S) <sub>8</sub> Pc] <sub>2</sub> Ce (3b) | 120              | a = 31.7                        | 27.4                            | 27.4               | (100)                           |
|                                                                            |                  |                                 | 15.4                            | 15.8               | (110)                           |
|                                                                            |                  |                                 | 13.3                            | 13.7               | (200)                           |
|                                                                            |                  |                                 | 10.0                            | 10.4               | (210)                           |
|                                                                            |                  |                                 | 8.8                             | 9.1                | (300)                           |
|                                                                            |                  |                                 | 7.3                             | 7.6                | (310)                           |
|                                                                            |                  |                                 | 6.5                             | 6.9                | (400)                           |
|                                                                            | 4.3              |                                 | Halo of molten alkylthio chains |                    |                                 |
|                                                                            | 23               | a = 33.5<br>h = 7.0<br>c = 3.3  | 29.0                            | 29.0               | (100)                           |
|                                                                            |                  |                                 | 16.4                            | 16.8               | (110)                           |
|                                                                            |                  |                                 | 14.1                            | 14.5               | (200)                           |
|                                                                            |                  |                                 | 10.6                            | 11.0               | (210)                           |
|                                                                            |                  |                                 | 9.3                             | 9.7                | (300)                           |
|                                                                            |                  |                                 | 8.0                             | 8.1                | (310)                           |
| 7.7                                                                        |                  |                                 | 7.3                             | (400)              |                                 |
| 7.0                                                                        |                  | h                               |                                 |                    |                                 |
| 4.3                                                                        |                  | Halo of molten alkylthio chains |                                 |                    |                                 |
| 3.3                                                                        |                  | c                               |                                 |                    |                                 |
| [(C <sub>12</sub> H <sub>25</sub> S) <sub>8</sub> Pc] <sub>2</sub> Ce (3c) | 160              | a = 31.5                        | 27.2                            | 27.2               | (100)                           |
|                                                                            |                  |                                 | 15.7                            | 15.7               | (110)                           |
|                                                                            |                  |                                 | 13.5                            | 13.6               | (200)                           |
|                                                                            |                  |                                 | 10.3                            | 10.3               | (210)                           |
|                                                                            |                  |                                 | 4.6                             |                    | Halo of molten alkylthio chains |
|                                                                            | 22               | a = 33.1<br>h = 7.0<br>c = 3.4  | 28.7                            | 28.7               | (100)                           |
|                                                                            |                  |                                 | 16.6                            | 16.5               | (110)                           |
|                                                                            |                  |                                 | 14.3                            | 14.3               | (200)                           |
|                                                                            |                  |                                 | 10.9                            | 10.8               | (210)                           |
|                                                                            |                  |                                 | 9.4                             | 9.6                | (300)                           |
| 7.0                                                                        |                  | h                               |                                 |                    |                                 |
| 4.4                                                                        |                  | Halo of molten alkylthio chains |                                 |                    |                                 |
| 3.4                                                                        |                  | c                               |                                 |                    |                                 |
| [(C <sub>14</sub> H <sub>29</sub> S) <sub>8</sub> Pc] <sub>2</sub> Ce (3d) | 80               | a = 35.0                        | 31.2                            | 30.3               | (100)                           |
|                                                                            |                  |                                 | 17.3                            | 17.5               | (110)                           |
|                                                                            |                  |                                 | 15.2                            | 15.2               | (200)                           |
|                                                                            |                  |                                 | 11.9                            | 11.5               | (210)                           |
|                                                                            |                  |                                 | 10.0                            | 10.1               | (300)                           |
|                                                                            |                  |                                 | 8.4                             | 8.4                | (310)                           |
|                                                                            |                  |                                 | 7.5                             | 7.6                | (400)                           |
|                                                                            |                  |                                 | 6.0                             | 6.1                | (500)                           |
|                                                                            | 4.7              |                                 | Halo of molten alkylthio chains |                    |                                 |
|                                                                            | 23               | a = 36.3<br>c = 3.3             | 32.1                            | 31.4               | (100)                           |
|                                                                            |                  |                                 | 18.4                            | 18.1               | (110)                           |
|                                                                            |                  |                                 | 15.7                            | 15.7               | (200)                           |
|                                                                            |                  |                                 | 11.8                            | 11.9               | (210)                           |
|                                                                            |                  |                                 | 10.5                            | 10.5               | (300)                           |
|                                                                            |                  |                                 | 8.7                             | 8.7                | (310)                           |
|                                                                            |                  |                                 | 7.9                             | 7.9                | (400)                           |
|                                                                            |                  |                                 | 6.8                             | 6.9                | (410)                           |
| 6.3                                                                        |                  |                                 | 6.3                             | (500)              |                                 |
| 4.4                                                                        |                  | Halo of molten alkylthio chains |                                 |                    |                                 |
| 4.3                                                                        |                  | Halo of molten alkylthio chains |                                 |                    |                                 |
| 3.3                                                                        |                  | c                               |                                 |                    |                                 |

(Continued)

|                                                                           |    |                                   |                                                                                |                                                                  |                                                                                                                                                 |
|---------------------------------------------------------------------------|----|-----------------------------------|--------------------------------------------------------------------------------|------------------------------------------------------------------|-------------------------------------------------------------------------------------------------------------------------------------------------|
| <b>[(C<sub>16</sub>H<sub>33</sub>S)<sub>8</sub>Pc]<sub>2</sub>Ce (3e)</b> | 80 | <b>a = 37.4</b>                   | 33.4<br>18.5<br>16.2<br>12.4<br>10.7<br>7.9<br>7.0<br>4.6                      | 32.4<br>18.7<br>16.2<br>12.2<br>10.8<br>8.1<br>7.1               | (100)<br>(110)<br>(200)<br>(210)<br>(300)<br>(400)<br>(410)<br>Halo of molten alkylthio chains                                                  |
|                                                                           | 23 | <b>a = 38.1</b><br><b>c = 3.3</b> | 33.6<br>19.1<br>16.5<br>10.9<br>9.3<br>8.2<br>7.3<br>6.8<br>4.4<br>4.1<br>3.3  | 33.0<br>19.1<br>16.5<br>11.0<br>9.2<br>8.3<br>7.2<br>6.6         | (100)<br>(110)<br>(200)<br>(300)<br>(310)<br>(400)<br>(410)<br>(500)<br>Halo of molten alkylthio chains<br>Halo of molten alkylthio chains<br>c |
| <b>[(C<sub>18</sub>H<sub>37</sub>S)<sub>8</sub>Pc]<sub>2</sub>Ce (3f)</b> | 80 | <b>a = 38.6</b>                   | 33.4<br>19.9<br>16.4<br>12.6<br>11.0<br>8.1<br>4.6                             | 33.4<br>19.3<br>16.7<br>12.6<br>11.1<br>8.4                      | (100)<br>(110)<br>(200)<br>(210)<br>(300)<br>(400)<br>Halo of molten alkylthio chains                                                           |
|                                                                           | 25 | <b>a = 38.9</b><br><b>c = 3.3</b> | 33.7<br>19.9<br>16.7<br>12.7<br>11.1<br>9.2<br>8.3<br>7.2<br>6.6<br>4.2<br>3.3 | 33.7<br>19.5<br>16.8<br>12.7<br>11.2<br>9.3<br>8.4<br>7.4<br>6.7 | (100)<br>(110)<br>(200)<br>(210)<br>(300)<br>(310)<br>(400)<br>(410)<br>(500)<br>Halo of molten alkylthio chains<br>c                           |

<sup>20</sup> h: Stacking periodicity between double-decker complexes.

C: Stacking periodicity between single-decker complexes.

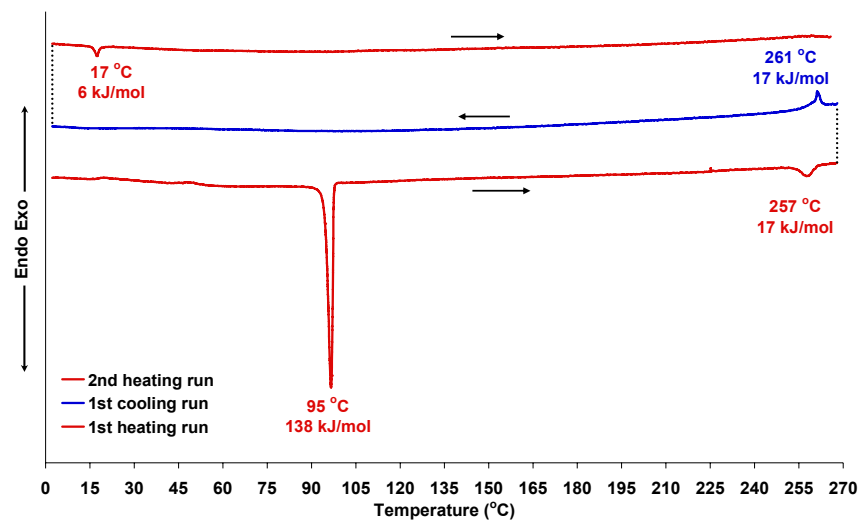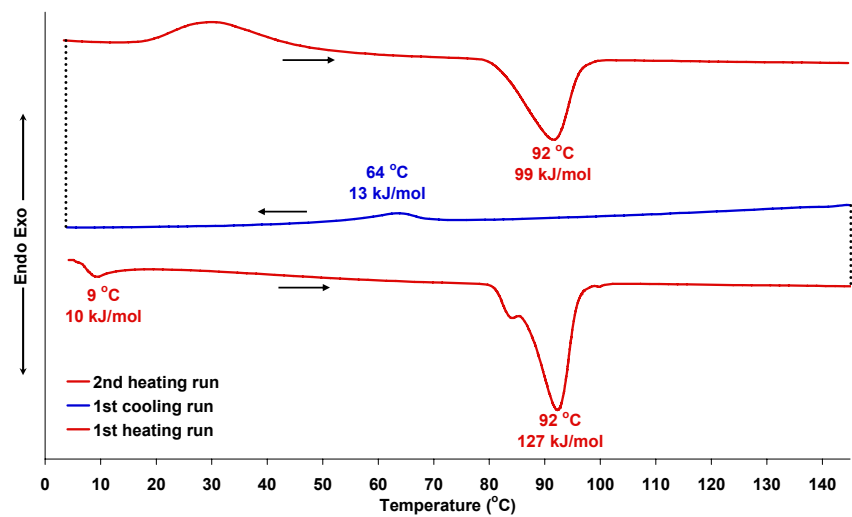

Fig. S2: DSC thermograms of 3a at 1 °C/min.

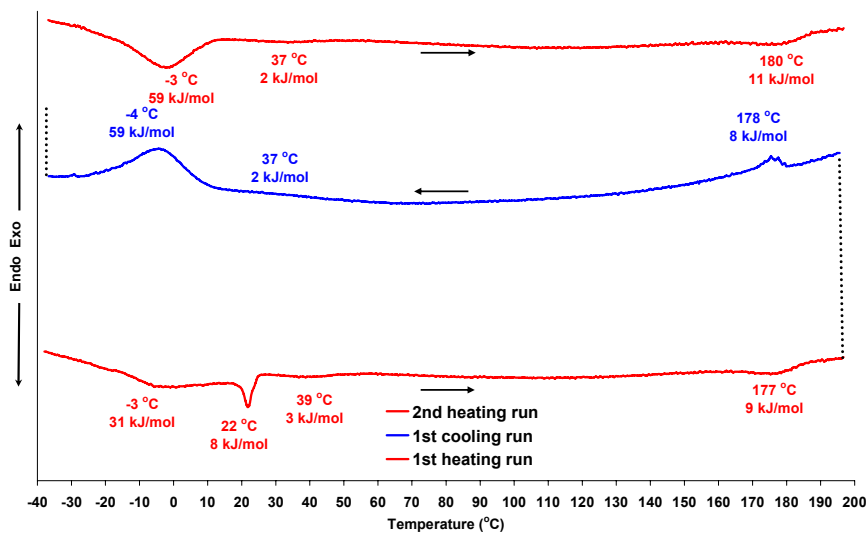

Fig. S3: DSC thermogram of 3c at 1 °C/min.

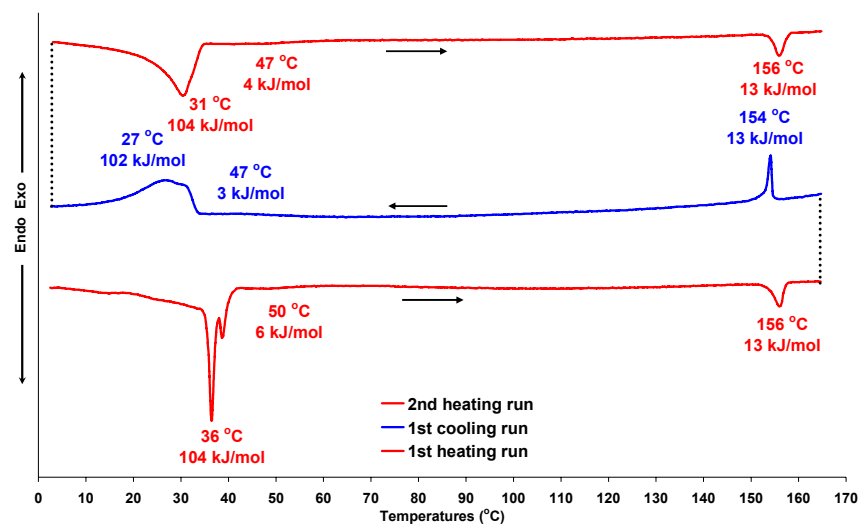

Fig. S4: DSC thermogram of **3d** at 1 °C/min.

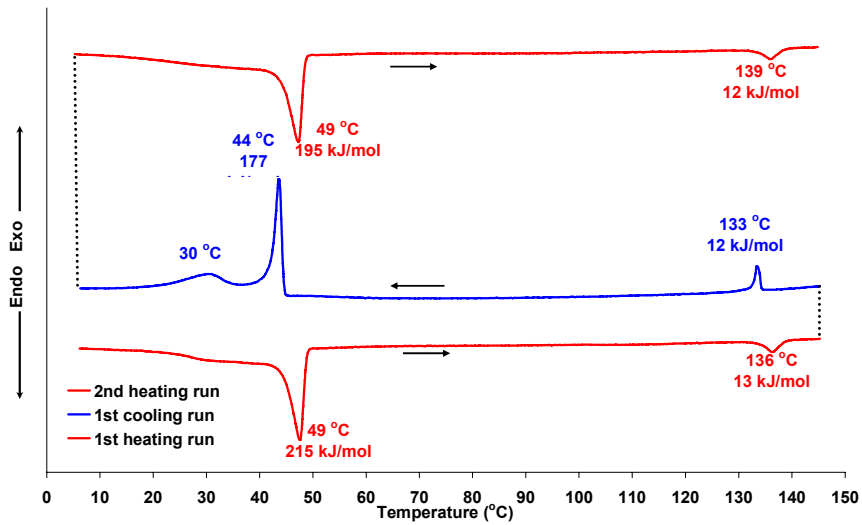

Fig. S5: DSC thermogram of **3e** at 1 °C/min.

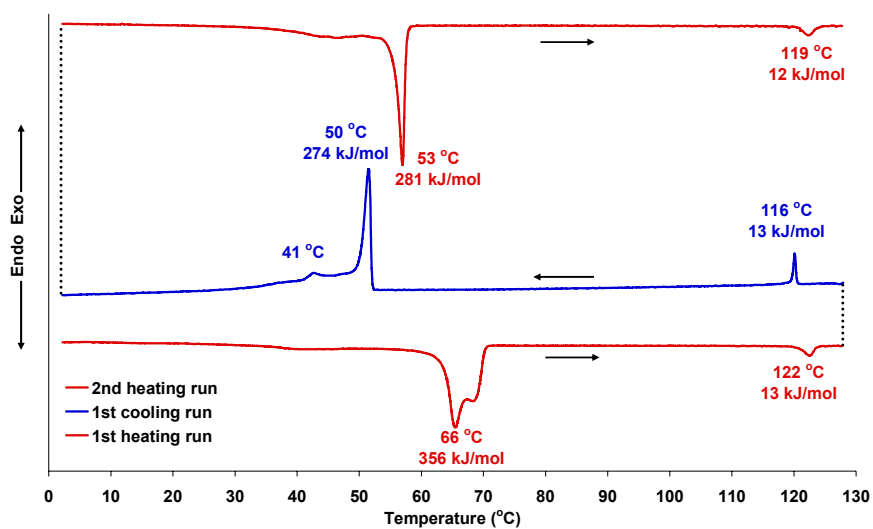

Fig. S6: DSC thermogram of 3f at 1 °C/min.
